# Supplementary material
Source: PubMed Central journal article supplement (PMC3630885)
Supplement: supp_M112.438473_jbc.M112.438473-1.pdf [file supp_M112.438473_jbc.M112.438473-1.pdf]

## Supplemental Figure 1

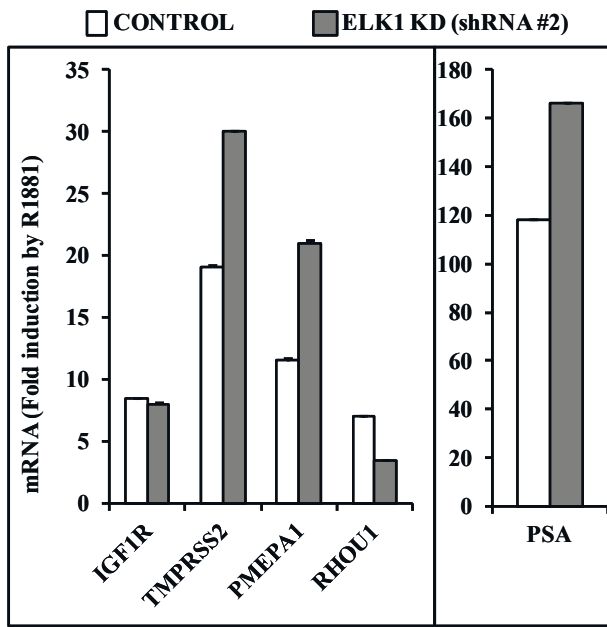

**Supplemental Figure 1.** Hormone depleted LNCaP cells were infected with Elk1 shRNA #2 lentivirus or control shRNA lentivirus. Following treatment with vehicle or R1881 (1nM), cells were harvested at 48 h of treatment to measure mRNA levels for the indicated androgen activated genes by quantitative real-time PCR.

## Supplemental Figure 2

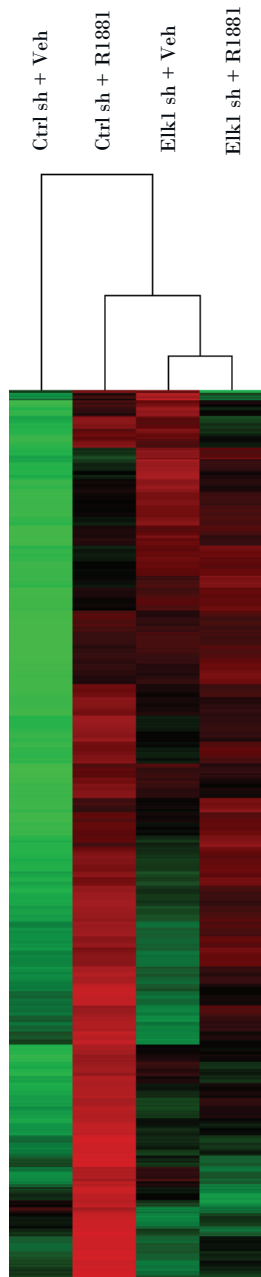

**Genes strongly repressed by Elk1.  
Androgen opposes repression by Elk1  
but does not independently activate  
these genes.**

**Elk1 is required for optimal activation  
gene activation by androgen.  
Androgen is at least partially  
dependent upon the presence of Elk1  
to activate these genes.**

**Supplemental Figure 2. Genes that are partially or fully dependent upon the presence of Elk1 for activation by R1881.** Heat map of Affymetrix DNA microarray analysis in LNCaP cells. The average values from replicate samples are indicated.

## Supplemental Figure 3

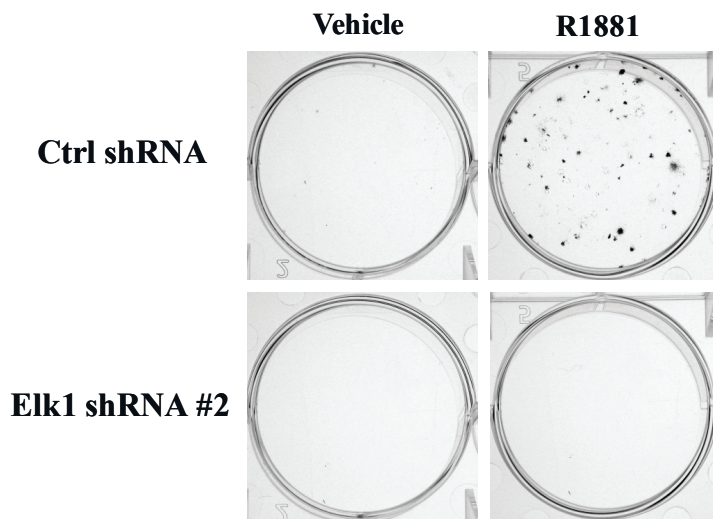

**Supplemental Figure 3.** Hormone-depleted C4-2 cells were infected with Elk shRNA #2 lentivirus or control shRNA lentivirus. Anchorage-dependent colony formation was measured following treatment with vehicle or R1881 (1nM). At the end of 2 weeks, colonies were stained with crystal violet.

## Supplemental Figure 4

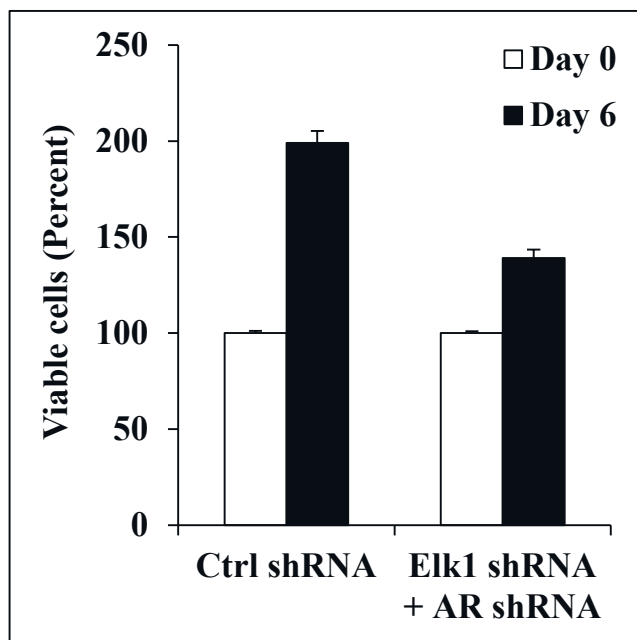

**Supplemental Figure 4.** Hormone depleted C4-2 cells were infected either with Elk1 shRNA and AR shRNA lentivirus or control lentivirus. 72 hours later (after knockdown had occurred) cell growth was monitored in hormone depleted media.

## Supplemental Figure 5

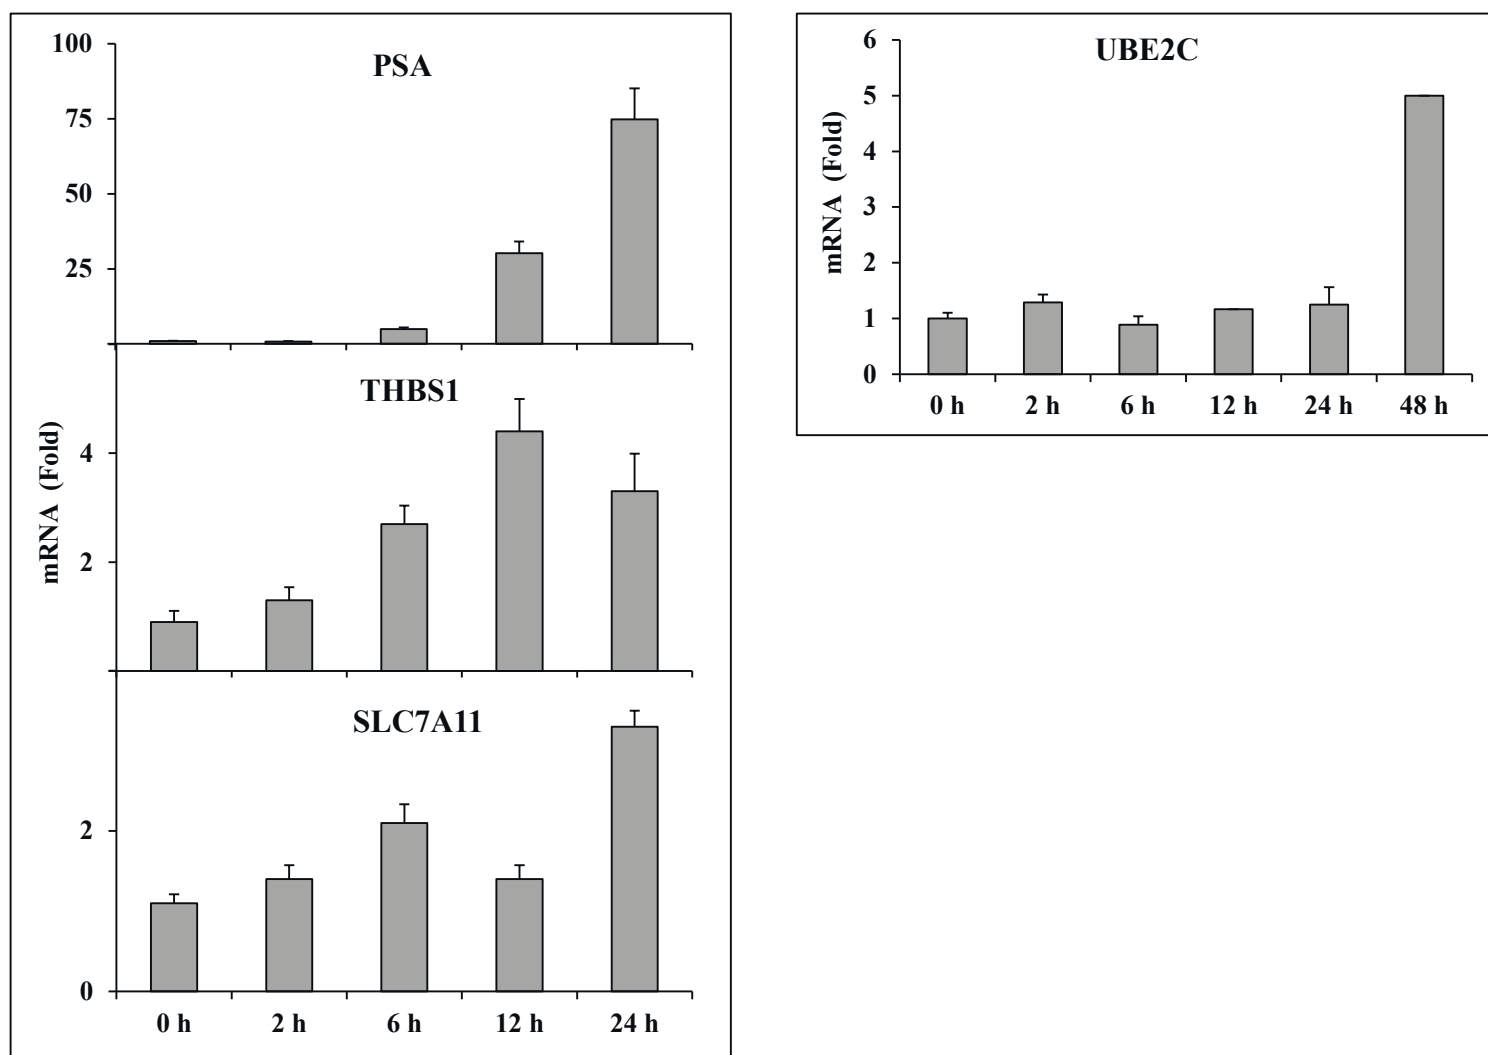

**Supplemental Figure 5.** Time course of induction of additional AR-Elk1 target genes by R1881. Hormone depleted LNCaP cells were treated with vehicle or R1881 for the indicated times. RNA was harvested and the induction of endogenous PSA, THBS1, SLC7A11 (*left panel*) and UBE2C (*right panel*) by R1881 was measured by real-time PCR. The Y-axis shows R1881 treated values relative to the vehicle control.

## Supplemental Figure 6

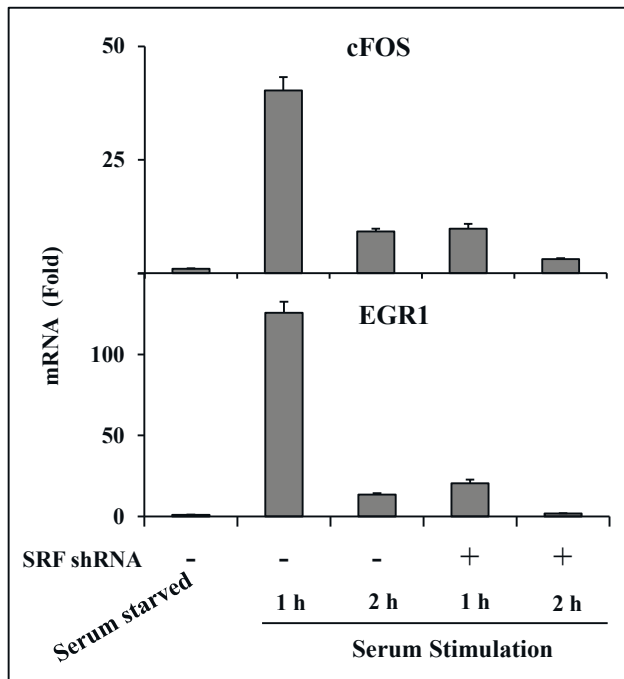

**Supplemental Figure 6.** Control showing abrogation of the immediate early gene response due to depletion of SRF. Hormone depleted LNCaP cells were infected with SRF shRNA lentivirus or control lentivirus. 72 h after infection, the cells were serum starved for 24 h and then stimulated with 20%FBS for the indicated times. RNA was harvested and the induction of endogenous cFOS and EGR1 by serum was measured by real-time PCR.

## Supplemental Figure 7

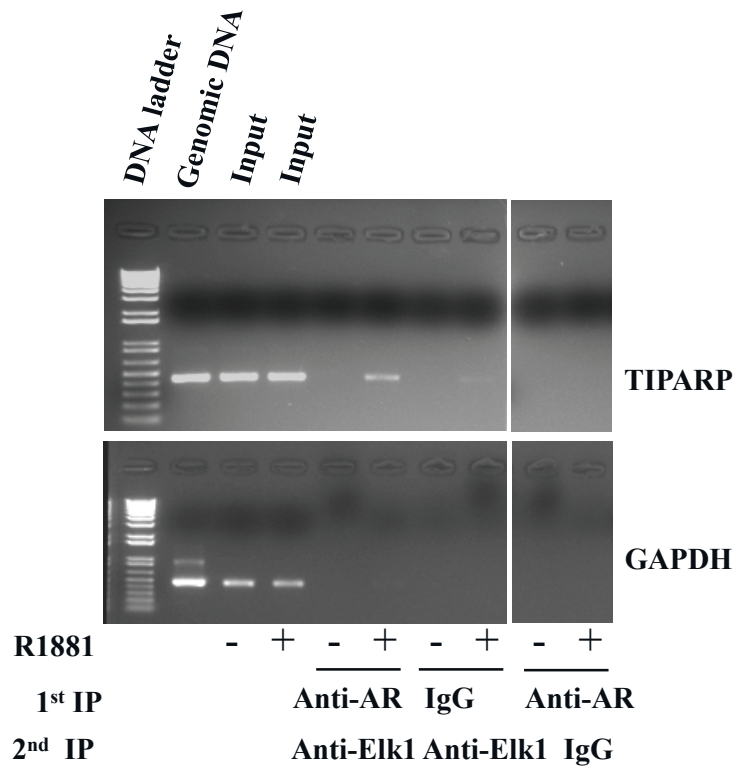

**Supplemental Figure 7.** Hormone-depleted LNCaP cells were treated with either vehicle or R1881 (1nM) for 2 hours. Cells were harvested and subjected to ChIP using either anti-AR antibody or normal rabbit IgG. The chromatin complexes from the first ChIP were subjected to re-ChIP using anti-Elk1 antibody. The immunoprecipitated complexes were amplified by PCR using primers specific for TIPARP gene promoter or a genomic sequence of GAPDH (non-target control). PCR products were analyzed by agarose gel electrophoresis on a 1% gel. Untreated genomic DNA was used as a control to ensure the specificity of the PCR amplification.

## Supplement 8

### The shRNA sequences are:

AR shRNA: (TRCN0000003718, MISSION™TRC shRNA Target Set, Sigma)  
CCGGCACCAATGTCAACTCCAGGATCTCGAGCTCCTGGAGTTGACATTGGTGTTTTT

ELK1 (shRNA #1): (TRCN0000007450, MISSION™TRC shRNA Target Set, Sigma)  
CCGGCCCAAGAGTAACTCTCATTATCTCGAGATAATGAGAGTTACTCTTGGGTTTTT

ELK1 (shRNA #2): (TRCN0000007453, MISSION™TRC shRNA Target Set, Sigma)  
CCGGCCTGCTTCTACGCATACATTCTCGAGAATGTATGCGTAGGAAGCAGGTTTTT

SRF shRNA: (TRCN0000003981, MISSION™TRC shRNA Target Set, Sigma)  
CCGGGAGACCGGCAAGGCACTGATTCTCGAGAATCAGTGCCTTGCCGGTCTCTTTTT

Non-target control shRNA: (MISSION™ Non-Target shRNA Control Vector, Sigma)  
CCGGCAACAAGATGAAGAGCACCAACTCGAGTTGGTGCTCTTCA TCTTGTTGTTTTT

### Real time PCR primer and TaqMan probe sequences for ChIP experiments:

The optimal target sequences chosen to amplify the genomic sequences by real-time qRT-PCR were as follows:

Major ARE enhancer region of the PSA promoter (-4366 to -3874 nt):

Forward primer: 5'-GCCTGGATCTGAGAGAGATATCATC-3'

Reverse primer: 5'-ACACCTTTTTTTTTCTGGATTGTTG-3'

Probe: 5'-/56-FAM/TGCAAGGATGCCTGCTTTACAAAC/36-TAMSp/-3'

Chromosome 5 (43075562-8194):

Forward primer: 5'-GAAACTGGCGCGTTGAACTTAGCA-3'

Reverse primer: 5'-TTAGGTGTGGAAGCACCGCTCTTA-3'

Probe: 5'-/56-FAM/TAGCGGATAGCGCTGGTATTGCCAAA/36-TAMSp/-3'

Chromosome 6 (91353148-5086):

Forward primer: 5'-ATTAAAGTGCGCGAACGGAAGTGG-3'

Reverse primer: 5'-GGCCAAGACATATTTACGCAGCA-3'

Probe: 5'-/56-FAM/TCCCTTAAGGACCAGCGGAAAGATA/36-TAMSp/-3'

Chromosome 1 (144218176-9723):

Forward primer: 5'-ACACTTCCGGTATCTTTCCGCACT-3'

Reverse primer: 5'-CGCCAGTCAAGCTGACCAATCAAA-3'

Probe: 5'-/56-FAM/TTACCGTGCAGAGGGAGGGATTAGA/36-TAMSp/-3'

TIPARP gene promoter:

Forward primer: 5'-GACTGCCCTTTGTACCGAATTCAC-3'

Reverse primer: 5'-GGCTCTAACTGCCTAAGAAGTGT-3'

Probe: 5'-/56-FAM/CCGGTCAGCATGAAGATCGAATTGGT/36-TAMSp/-3'

### PCR primer sequences for Re-ChIP experiments:



The forward and reverse primer sequences for amplifying the 407bp fragment of the promoter region of the TIPARP gene are:

5'-GCTACAGGTACCCCACTTAAAGCAGAGATCGAGGTGACAGGCGAGC-3' and  
5'-GCTACAGCTAGCCCATCTTCATGCTGACGGGACCCGACTGAATTCG-3'

The forward and reverse primers for amplifying the 478bp genomic fragment within the GAPDH gene are:

5'-TTCCCGTCCTCCTTATCCCCAGCTGGGTTGCAACCAAATTGCCAGAG-3' and  
5'-GACAAAGTGATGGCAACAGTAAAAAGATCAGGGGTTGTGGGGAGAGAGG-3'
