# Supplementary material
Source: PubMed Central journal article supplement (PMC3630885)
Supplement: supp_M112.438473_jbc.M112.438473-2.pdf [file supp_M112.438473_jbc.M112.438473-2.pdf]

**Supplemental Table 1**

| <b>AFFY IDS</b> | <b>Gene</b> | <b>Ctrl R1881/Veh</b> | <b>Elk1-kd R1881/veh</b> | <b>Elk1 dependent stimulation by R1881 (Fold)</b> |
|-----------------|-------------|-----------------------|--------------------------|---------------------------------------------------|
| 221436_s_at     | CDCA3       | 7.19                  | 0.69                     | 10.37                                             |
| 202870_s_at     | CDC20       | 5.59                  | 0.66                     | 8.47                                              |
| 218585_s_at     | DTL         | 9.45                  | 1.25                     | 7.58                                              |
| 1557128_at      | FAM111B     | 13.04                 | 1.86                     | 7.01                                              |
| 1563022_at      | CCDC160     | 8.34                  | 1.29                     | 6.44                                              |
| 201650_at       | KRT19       | 178.00                | 28.02                    | 6.35                                              |
| 217678_at       | SLC7A11     | 3.81                  | 0.61                     | 6.27                                              |
| 228033_at       | E2F7        | 4.34                  | 0.74                     | 5.86                                              |
| 201890_at       | RRM2        | 6.16                  | 1.07                     | 5.77                                              |
| 223570_at       | MCM10       | 4.79                  | 0.86                     | 5.57                                              |
| 218662_s_at     | NCAPG       | 4.94                  | 0.89                     | 5.53                                              |
| 227609_at       | EPSTI1      | 5.93                  | 1.10                     | 5.41                                              |
| 1557129_a_at    | FAM111B     | 18.08                 | 3.36                     | 5.38                                              |
| 237939_at       | EPHA5       | 1.52                  | 0.30                     | 5.12                                              |
| 243938_x_at     | DNAH5       | 4.43                  | 0.88                     | 5.05                                              |
| 209921_at       | SLC7A11     | 3.08                  | 0.61                     | 5.05                                              |
| 218542_at       | CEP55       | 4.72                  | 0.94                     | 5.00                                              |
| 203764_at       | DLGAP5      | 3.47                  | 0.74                     | 4.66                                              |
| 230577_at       | LOC10050    | 172.46                | 37.54                    | 4.59                                              |
| 204822_at       | TTK         | 5.12                  | 1.13                     | 4.55                                              |
| 218663_at       | NCAPG       | 4.35                  | 0.97                     | 4.49                                              |
| 220786_s_at     | SLC38A4     | 39.63                 | 8.90                     | 4.46                                              |
| 201292_at       | TOP2A       | 3.36                  | 0.76                     | 4.43                                              |
| 202095_s_at     | BIRC5       | 4.14                  | 0.94                     | 4.38                                              |
| 222958_s_at     | DEPDC1      | 4.27                  | 0.98                     | 4.35                                              |
| 207165_at       | HMMR        | 4.77                  | 1.11                     | 4.31                                              |
| 220723_s_at     | CWH43       | 1.85                  | 0.43                     | 4.30                                              |
| 229551_x_at     | ZNF367      | 4.31                  | 1.00                     | 4.29                                              |
| 201291_s_at     | TOP2A       | 3.33                  | 0.78                     | 4.28                                              |
| 207828_s_at     | CENPF       | 3.01                  | 0.71                     | 4.25                                              |
| 204162_at       | NDC80       | 3.02                  | 0.73                     | 4.16                                              |
| 209610_s_at     | SLC1A4      | 2.47                  | 0.60                     | 4.15                                              |
| 204641_at       | NEK2        | 3.11                  | 0.75                     | 4.15                                              |
| 230631_s_at     | LOC10028    | 21.56                 | 5.23                     | 4.12                                              |
| 207528_s_at     | SLC7A11     | 3.58                  | 0.88                     | 4.06                                              |
| 204298_s_at     | LOX         | 11.79                 | 2.92                     | 4.04                                              |
| 205047_s_at     | ASNS        | 1.83                  | 0.46                     | 3.98                                              |
| 228323_at       | CASC5       | 2.00                  | 0.51                     | 3.92                                              |
| 211126_s_at     | CSRP2       | 6.94                  | 1.79                     | 3.89                                              |
| 239578_at       | ---         | 4.01                  | 1.04                     | 3.87                                              |
| 209773_s_at     | RRM2        | 3.96                  | 1.05                     | 3.77                                              |
| 223700_at       | MND1        | 3.63                  | 0.98                     | 3.70                                              |
| 219990_at       | E2F8        | 2.97                  | 0.82                     | 3.63                                              |
| 218039_at       | NUSAP1      | 3.66                  | 1.02                     | 3.60                                              |
| 204351_at       | S100P       | 8.21                  | 2.28                     | 3.60                                              |
| 242398_x_at     | ---         | 3.23                  | 0.90                     | 3.60                                              |
| 214920_at       | THSD7A      | 11.29                 | 3.15                     | 3.59                                              |
| 222680_s_at     | DTL         | 3.33                  | 0.95                     | 3.49                                              |
| 1555390_at      | C14orf21    | 2.25                  | 0.65                     | 3.46                                              |
| 201294_s_at     | WSB1        | 2.24                  | 0.65                     | 3.43                                              |

|              |             |        |       |      |
|--------------|-------------|--------|-------|------|
| 204531_s_at  | BRCA1       | 2.32   | 0.68  | 3.41 |
| 205040_at    | ORM1        | 79.98  | 23.54 | 3.40 |
| 229097_at    | DIAPH3      | 2.39   | 0.72  | 3.33 |
| 216250_s_at  | LPXN        | 7.05   | 2.13  | 3.31 |
| 219148_at    | PBK         | 3.49   | 1.06  | 3.30 |
| 207030_s_at  | CSRP2       | 10.90  | 3.33  | 3.28 |
| 231094_s_at  | MTHFD1L     | 2.90   | 0.88  | 3.27 |
| 228281_at    | C11orf82    | 3.13   | 0.96  | 3.25 |
| 214437_s_at  | SHMT2       | 2.41   | 0.74  | 3.24 |
| 222039_at    | KIF18B      | 2.81   | 0.88  | 3.20 |
| 221489_s_at  | SPRY4       | 3.76   | 1.19  | 3.17 |
| 203967_at    | CDC6        | 3.66   | 1.17  | 3.13 |
| 212810_s_at  | SLC1A4      | 2.01   | 0.65  | 3.11 |
| 202503_s_at  | KIAA0101    | 2.92   | 0.94  | 3.09 |
| 202705_at    | CCNB2       | 2.60   | 0.84  | 3.09 |
| 201110_s_at  | THBS1       | 4.87   | 1.58  | 3.09 |
| 205421_at    | SLC22A3     | 2.16   | 0.70  | 3.08 |
| 226980_at    | DEPDC1B     | 3.81   | 1.25  | 3.06 |
| 203439_s_at  | STC2        | 1.51   | 0.49  | 3.05 |
| 202721_s_at  | GFPT1       | 2.89   | 0.95  | 3.05 |
| 215806_x_at  | TARP /// TI | 29.39  | 9.67  | 3.04 |
| 209891_at    | SPC25       | 3.69   | 1.22  | 3.03 |
| 231070_at    | IYD         | 2.10   | 0.69  | 3.03 |
| 205554_s_at  | DNASE1L3    | 2.14   | 0.71  | 3.03 |
| 218741_at    | CENPM       | 3.10   | 1.03  | 3.02 |
| 1568924_a_at | IQUB        | 3.22   | 1.08  | 2.98 |
| 222608_s_at  | ANLN        | 3.13   | 1.06  | 2.96 |
| 227786_at    | MED30       | 1.95   | 0.66  | 2.94 |
| 223307_at    | CDCA3       | 2.60   | 0.89  | 2.93 |
| 235545_at    | DEPDC1      | 2.76   | 0.94  | 2.92 |
| 232639_at    | C3orf25     | 12.91  | 4.43  | 2.92 |
| 201006_at    | PRDX2       | 1.54   | 0.54  | 2.88 |
| 214095_at    | SHMT2       | 2.24   | 0.78  | 2.87 |
| 1554271_a_at | CENPL       | 1.90   | 0.66  | 2.87 |
| 228966_at    | PANK2       | 1.92   | 0.67  | 2.87 |
| 211658_at    | PRDX2       | 2.30   | 0.80  | 2.86 |
| 208693_s_at  | GARS        | 1.92   | 0.67  | 2.85 |
| 219493_at    | SHCBP1      | 3.30   | 1.16  | 2.83 |
| 235676_at    | ---         | 3.67   | 1.30  | 2.82 |
| 228069_at    | FAM54A      | 2.19   | 0.78  | 2.80 |
| 225520_at    | MTHFD1L     | 2.02   | 0.73  | 2.78 |
| 208581_x_at  | MT1X        | 1.76   | 0.64  | 2.75 |
| 232413_at    | ---         | 1.66   | 0.60  | 2.75 |
| 217503_at    | STK17B      | 4.28   | 1.56  | 2.74 |
| 225540_at    | MAP2        | 2.20   | 0.80  | 2.74 |
| 219978_s_at  | NUSAP1      | 2.98   | 1.09  | 2.73 |
| 1553697_at   | C1orf96     | 2.78   | 1.02  | 2.73 |
| 244317_at    | KIAA1324L   | 1.95   | 0.72  | 2.73 |
| 221539_at    | EIF4EBP1    | 2.31   | 0.86  | 2.69 |
| 1553810_a_at | KIAA1524    | 1.53   | 0.57  | 2.68 |
| 210559_s_at  | CDK1        | 2.33   | 0.87  | 2.67 |
| 219974_x_at  | ECHDC1      | 2.88   | 1.08  | 2.67 |
| 209855_s_at  | KLK2        | 163.87 | 61.47 | 2.67 |
| 230438_at    | TBX15       | 4.94   | 1.86  | 2.66 |
| 205475_at    | SCRG1       | 1.99   | 0.75  | 2.65 |

|              |          |        |       |      |
|--------------|----------|--------|-------|------|
| 201599_at    | OAT      | 2.17   | 0.82  | 2.64 |
| 204887_s_at  | PLK4     | 1.83   | 0.70  | 2.63 |
| 208916_at    | SLC1A5   | 2.81   | 1.07  | 2.63 |
| 206731_at    | CNKSR2   | 3.12   | 1.19  | 2.63 |
| 201663_s_at  | SMC4     | 1.96   | 0.75  | 2.62 |
| 217967_s_at  | FAM129A  | 2.24   | 0.85  | 2.62 |
| 206461_x_at  | MT1H     | 1.81   | 0.69  | 2.62 |
| 219494_at    | RAD54B   | 3.52   | 1.36  | 2.59 |
| 241895_at    | LOC44090 | 2.73   | 1.05  | 2.59 |
| 207824_s_at  | MAZ      | 3.86   | 1.49  | 2.59 |
| 228273_at    | PRR11    | 2.79   | 1.08  | 2.58 |
| 242498_x_at  | ---      | 1.79   | 0.69  | 2.58 |
| 204326_x_at  | MT1X     | 1.77   | 0.69  | 2.56 |
| 203789_s_at  | SEMA3C   | 3.51   | 1.38  | 2.55 |
| 214804_at    | CENPI    | 2.95   | 1.16  | 2.54 |
| 202402_s_at  | CARS     | 1.67   | 0.66  | 2.54 |
| 1569108_a_at | ZNF589   | 1.88   | 0.74  | 2.54 |
| 204825_at    | MELK     | 2.10   | 0.83  | 2.54 |
| 217165_x_at  | MT1F     | 2.19   | 0.87  | 2.52 |
| 209709_s_at  | HMMR     | 2.80   | 1.12  | 2.51 |
| 205393_s_at  | CHEK1    | 1.90   | 0.76  | 2.50 |
| 243001_at    | RBFA     | 2.44   | 0.98  | 2.49 |
| 204444_at    | KIF11    | 1.71   | 0.69  | 2.49 |
| 216126_at    | ---      | 1.77   | 0.72  | 2.47 |
| 242578_x_at  | SLC22A3  | 1.65   | 0.67  | 2.47 |
| 209387_s_at  | TM4SF1   | 8.36   | 3.41  | 2.45 |
| 207227_x_at  | RFPL2    | 5.32   | 2.17  | 2.45 |
| 218883_s_at  | MLF1IP   | 2.68   | 1.10  | 2.45 |
| 209172_s_at  | CENPF    | 2.59   | 1.06  | 2.45 |
| 223381_at    | NUF2     | 2.32   | 0.96  | 2.43 |
| 211456_x_at  | MT1P2    | 1.55   | 0.64  | 2.43 |
| 38241_at     | BTN3A3   | 1.90   | 0.79  | 2.42 |
| 210372_s_at  | TPD52L1  | 2.24   | 0.93  | 2.41 |
| 220738_s_at  | RPS6KA6  | 1.66   | 0.69  | 2.41 |
| 221782_at    | DNAJC10  | 3.75   | 1.56  | 2.40 |
| 203755_at    | BUB1B    | 1.52   | 0.63  | 2.40 |
| 230150_at    | BCAP29   | 2.13   | 0.89  | 2.40 |
| 202847_at    | PCK2     | 1.71   | 0.71  | 2.40 |
| 227192_at    | PRRT2    | 2.93   | 1.23  | 2.38 |
| 208549_x_at  | PTMA     | 2.08   | 0.88  | 2.37 |
| 215616_s_at  | KDM4B    | 2.23   | 0.94  | 2.37 |
| 202954_at    | UBE2C    | 2.49   | 1.06  | 2.35 |
| 237158_s_at  | MPHOSP1  | 3.97   | 1.69  | 2.35 |
| 1560222_at   | ---      | 1.85   | 0.79  | 2.34 |
| 235572_at    | SPC24    | 1.82   | 0.78  | 2.34 |
| 243483_at    | TRPM8    | 126.48 | 54.11 | 2.34 |
| 201761_at    | MTHFD2   | 1.82   | 0.78  | 2.33 |
| 216307_at    | DGKB     | 2.65   | 1.14  | 2.33 |
| 1553220_at   | FAM117B  | 2.03   | 0.87  | 2.32 |
| 216336_x_at  | LOC10050 | 1.51   | 0.65  | 2.32 |
| 210951_x_at  | RAB27A   | 9.95   | 4.29  | 2.32 |
| 229305_at    | MLF1IP   | 2.72   | 1.17  | 2.32 |
| 217127_at    | CTH      | 2.51   | 1.08  | 2.32 |
| 1569283_at   | ZNF891   | 1.86   | 0.80  | 2.32 |
| 229588_at    | DNAJC10  | 2.43   | 1.05  | 2.31 |

|              |          |        |        |      |
|--------------|----------|--------|--------|------|
| 204583_x_at  | KLK3     | 352.95 | 152.80 | 2.31 |
| 233197_at    | KLHL9    | 1.64   | 0.71   | 2.30 |
| 242427_at    | WAC      | 2.89   | 1.26   | 2.30 |
| 202183_s_at  | KIF22    | 7.18   | 3.13   | 2.29 |
| 229572_at    | ATP6V0A2 | 1.66   | 0.72   | 2.29 |
| 203072_at    | MYO1E    | 4.20   | 1.84   | 2.28 |
| 235247_at    | ---      | 3.79   | 1.66   | 2.28 |
| 235386_at    | ---      | 1.55   | 0.68   | 2.27 |
| 235445_at    | ---      | 59.69  | 26.35  | 2.27 |
| 210062_s_at  | ZNF589   | 2.11   | 0.93   | 2.26 |
| 204286_s_at  | PMAIP1   | 2.92   | 1.29   | 2.26 |
| 238513_at    | PRRG4    | 2.12   | 0.94   | 2.25 |
| 207038_at    | SLC16A6  | 6.27   | 2.79   | 2.25 |
| 200770_s_at  | LAMC1    | 5.23   | 2.33   | 2.24 |
| 209567_at    | RRS1     | 1.65   | 0.74   | 2.24 |
| 214096_s_at  | SHMT2    | 1.82   | 0.82   | 2.23 |
| 207226_at    | HIST1H2B | 2.25   | 1.01   | 2.23 |
| 235999_at    | ---      | 1.73   | 0.77   | 2.23 |
| 208353_x_at  | ANK1     | 3.38   | 1.52   | 2.23 |
| 234985_at    | LDLRAD3  | 2.33   | 1.05   | 2.23 |
| 225655_at    | UHRF1    | 2.30   | 1.03   | 2.22 |
| 1553494_at   | TDH      | 1.81   | 0.81   | 2.22 |
| 218736_s_at  | PALMD    | 4.66   | 2.10   | 2.22 |
| 228229_at    | ZNF526   | 1.72   | 0.78   | 2.22 |
| 212048_s_at  | YARS     | 1.75   | 0.79   | 2.21 |
| 213599_at    | OIP5     | 1.87   | 0.85   | 2.21 |
| 235062_at    | PIH1D2   | 1.53   | 0.69   | 2.21 |
| 1561817_at   | ---      | 7.53   | 3.41   | 2.21 |
| 216568_x_at  | ---      | 3.95   | 1.79   | 2.20 |
| 1555091_at   | PPM1F    | 3.09   | 1.41   | 2.19 |
| 209825_s_at  | UCK2     | 2.25   | 1.03   | 2.18 |
| 1556923_at   | ---      | 2.48   | 1.14   | 2.17 |
| 204745_x_at  | MT1G     | 1.63   | 0.75   | 2.17 |
| 220885_s_at  | CENPJ    | 2.28   | 1.06   | 2.16 |
| 218355_at    | KIF4A    | 2.98   | 1.38   | 2.16 |
| 209386_at    | TM4SF1   | 5.19   | 2.42   | 2.15 |
| 203372_s_at  | SOCS2    | 4.21   | 1.96   | 2.15 |
| 210527_x_at  | TUBA3C   | 4.62   | 2.15   | 2.14 |
| 1552540_s_at | IQCD     | 1.94   | 0.90   | 2.14 |
| 1560827_at   | ---      | 1.54   | 0.72   | 2.13 |
| 212971_at    | CARS     | 1.52   | 0.71   | 2.13 |
| 206023_at    | NMU      | 1.54   | 0.72   | 2.13 |
| 242487_at    | CC2D1B   | 1.60   | 0.76   | 2.12 |
| 205622_at    | SMPD2    | 5.57   | 2.63   | 2.12 |
| 1553698_a_at | C1orf96  | 2.33   | 1.10   | 2.12 |
| 237907_at    | ---      | 1.59   | 0.75   | 2.12 |
| 217989_at    | HSD17B11 | 3.89   | 1.84   | 2.12 |
| 217788_s_at  | GALNT2   | 1.64   | 0.78   | 2.11 |
| 222118_at    | CENPN    | 31.42  | 14.88  | 2.11 |
| 204285_s_at  | PMAIP1   | 2.38   | 1.13   | 2.10 |
| 213433_at    | ARL3     | 1.58   | 0.75   | 2.10 |
| 208352_x_at  | ANK1     | 4.15   | 1.98   | 2.10 |
| 209230_s_at  | NUPR1    | 1.55   | 0.74   | 2.09 |
| 201063_at    | RCN1     | 1.54   | 0.74   | 2.09 |
| 204962_s_at  | CENPA    | 1.82   | 0.87   | 2.08 |

|              |             |       |       |      |
|--------------|-------------|-------|-------|------|
| 222520_s_at  | IFT57       | 1.68  | 0.81  | 2.08 |
| 233110_s_at  | BCL2L12     | 1.84  | 0.89  | 2.08 |
| 229831_at    | CNTN3       | 2.17  | 1.05  | 2.07 |
| 1556265_at   | C20orf202   | 1.72  | 0.83  | 2.07 |
| 228531_at    | SAMD9       | 1.59  | 0.77  | 2.07 |
| 226875_at    | DOCK11      | 2.09  | 1.01  | 2.07 |
| 217966_s_at  | FAM129A     | 1.77  | 0.86  | 2.07 |
| 203373_at    | SOCS2       | 3.85  | 1.87  | 2.07 |
| 211689_s_at  | TMPRSS2     | 40.67 | 19.73 | 2.06 |
| 231629_x_at  | KLK3        | 6.28  | 3.05  | 2.06 |
| 219199_at    | AFF4        | 2.73  | 1.33  | 2.06 |
| 1554217_a_at | CCDC132     | 1.51  | 0.73  | 2.06 |
| 203252_at    | CDK2AP2     | 2.18  | 1.07  | 2.05 |
| 213189_at    | MINA        | 1.61  | 0.79  | 2.04 |
| 203362_s_at  | MAD2L1      | 2.01  | 0.98  | 2.04 |
| 216450_x_at  | HSP90B1     | 1.98  | 0.97  | 2.04 |
| 209408_at    | KIF2C       | 1.66  | 0.81  | 2.04 |
| 203780_at    | MPZL2       | 1.61  | 0.79  | 2.04 |
| 205347_s_at  | TMSB15A     | 3.39  | 1.67  | 2.04 |
| 220774_at    | DYM         | 1.78  | 0.88  | 2.03 |
| 1559530_at   | ---         | 1.98  | 0.97  | 2.03 |
| 242370_at    | MTHFD2L     | 1.50  | 0.74  | 2.03 |
| 214308_s_at  | HGD         | 2.48  | 1.22  | 2.03 |
| 236069_at    | ---         | 1.90  | 0.94  | 2.03 |
| 243560_at    | ---         | 2.43  | 1.20  | 2.02 |
| 204027_s_at  | METTLL1     | 1.52  | 0.75  | 2.02 |
| 230721_at    | C16orf52 // | 1.67  | 0.83  | 2.02 |
| 224884_at    | AKAP13      | 1.55  | 0.77  | 2.02 |
| 1561418_at   | ---         | 1.82  | 0.90  | 2.02 |
| 203276_at    | LMNB1       | 1.53  | 0.76  | 2.01 |
| 210790_s_at  | SAR1A       | 2.54  | 1.27  | 2.01 |
| 204423_at    | MKLN1       | 2.03  | 1.01  | 2.01 |
| 204800_s_at  | DHRS12      | 1.98  | 0.99  | 2.01 |
| 208978_at    | CRIP2       | 2.97  | 1.48  | 2.00 |
| 233230_s_at  | SLAIN2      | 1.83  | 0.91  | 2.00 |
| 230748_at    | SLC16A6     | 5.81  | 2.91  | 1.99 |
| 203786_s_at  | TPD52L1     | 1.88  | 0.94  | 1.99 |
| 228308_at    | FKBP11      | 2.40  | 1.21  | 1.99 |
| 1565852_at   | ---         | 1.80  | 0.91  | 1.98 |
| 212973_at    | RPIA        | 1.75  | 0.88  | 1.98 |
| 203554_x_at  | PTTG1       | 2.25  | 1.13  | 1.98 |
| 211048_s_at  | PDIA4       | 2.01  | 1.02  | 1.98 |
| 242663_at    | LOC14818    | 2.21  | 1.12  | 1.98 |
| 217619_x_at  | ---         | 1.60  | 0.81  | 1.98 |
| 238717_at    | ---         | 1.94  | 0.98  | 1.97 |
| 242450_at    | RGMB        | 2.29  | 1.16  | 1.97 |
| 203214_x_at  | CDK1        | 1.55  | 0.79  | 1.97 |
| 220800_s_at  | TMOD3       | 1.74  | 0.88  | 1.97 |
| 213008_at    | FANCI       | 2.05  | 1.04  | 1.97 |
| 235457_at    | MAML2       | 3.90  | 1.98  | 1.97 |
| 204318_s_at  | GTSE1       | 1.73  | 0.88  | 1.97 |
| 216920_s_at  | TARP /// TI | 14.33 | 7.30  | 1.96 |
| 241827_at    | ZNF615      | 2.95  | 1.51  | 1.96 |
| 1560977_a_at | BCL2L13     | 1.88  | 0.96  | 1.96 |
| 219105_x_at  | ORC6        | 2.37  | 1.21  | 1.95 |

|              |             |       |       |      |
|--------------|-------------|-------|-------|------|
| 219620_x_at  | C9orf167    | 1.55  | 0.79  | 1.95 |
| 209309_at    | AZGP1       | 28.15 | 14.42 | 1.95 |
| 210377_at    | ACSM3       | 3.02  | 1.55  | 1.95 |
| 222747_s_at  | SCML1       | 1.80  | 0.93  | 1.94 |
| 202375_at    | SEC24D      | 2.99  | 1.54  | 1.94 |
| 212543_at    | AIM1        | 4.80  | 2.48  | 1.94 |
| 229470_at    | ---         | 1.94  | 1.00  | 1.93 |
| 219694_at    | FAM105A     | 12.95 | 6.71  | 1.93 |
| 224428_s_at  | CDCA7       | 2.01  | 1.04  | 1.93 |
| 231772_x_at  | CENPH       | 1.98  | 1.03  | 1.92 |
| 213913_s_at  | TBC1D30     | 2.12  | 1.11  | 1.92 |
| 212558_at    | SPRY1       | 2.43  | 1.27  | 1.91 |
| 201625_s_at  | INSIG1      | 3.07  | 1.60  | 1.91 |
| 212290_at    | SLC7A1      | 1.67  | 0.87  | 1.91 |
| 220389_at    | CCDC81      | 4.03  | 2.11  | 1.91 |
| 229620_at    | ---         | 4.84  | 2.54  | 1.91 |
| 210792_x_at  | SIVA1       | 1.86  | 0.97  | 1.90 |
| 211150_s_at  | DLAT        | 1.74  | 0.91  | 1.90 |
| 212915_at    | PDZRN3      | 1.87  | 0.99  | 1.90 |
| 215195_at    | PRKCA       | 2.28  | 1.20  | 1.90 |
| 239580_at    | GUCY1A3     | 1.71  | 0.91  | 1.89 |
| 204244_s_at  | DBF4        | 2.45  | 1.30  | 1.89 |
| 211681_s_at  | PDLIM5      | 1.63  | 0.86  | 1.88 |
| 210339_s_at  | KLK2        | 69.52 | 36.99 | 1.88 |
| 221272_s_at  | C1orf21     | 4.74  | 2.53  | 1.87 |
| 214307_at    | HGD         | 2.75  | 1.47  | 1.87 |
| 239761_at    | GCNT1       | 2.74  | 1.46  | 1.87 |
| 222309_at    | LOC10050    | 1.58  | 0.85  | 1.87 |
| 217053_x_at  | ETV1        | 2.19  | 1.18  | 1.86 |
| 225144_at    | BMPR2       | 2.26  | 1.21  | 1.86 |
| 204767_s_at  | FEN1        | 2.16  | 1.16  | 1.86 |
| 219374_s_at  | ALG9 /// FI | 1.68  | 0.90  | 1.86 |
| 231011_at    | LARP1B      | 1.59  | 0.85  | 1.86 |
| 221779_at    | MICALL1     | 1.85  | 1.00  | 1.86 |
| 220295_x_at  | DEPDC1      | 2.80  | 1.50  | 1.86 |
| 222294_s_at  | RAB27A      | 6.40  | 3.44  | 1.86 |
| 1559315_s_at | LOC14448    | 3.92  | 2.11  | 1.86 |
| 200670_at    | XBP1        | 1.58  | 0.85  | 1.85 |
| 210570_x_at  | MAPK9       | 1.51  | 0.81  | 1.85 |
| 209169_at    | GPM6B       | 1.68  | 0.91  | 1.85 |
| 227028_s_at  | DGCR2       | 1.56  | 0.84  | 1.85 |
| 219230_at    | TMEM100     | 7.71  | 4.17  | 1.85 |
| 205406_s_at  | SPA17       | 1.90  | 1.03  | 1.85 |
| 219555_s_at  | CENPN       | 13.19 | 7.14  | 1.85 |
| 225174_at    | DNAJC10     | 2.53  | 1.37  | 1.84 |
| 219211_at    | USP18       | 1.54  | 0.84  | 1.84 |
| 234529_at    | PCGEM1      | 2.41  | 1.31  | 1.83 |
| 219565_at    | CYP20A1     | 1.76  | 0.96  | 1.83 |
| 209514_s_at  | RAB27A      | 6.70  | 3.65  | 1.83 |
| 214482_at    | ZBTB25      | 1.73  | 0.94  | 1.83 |
| 231319_x_at  | KIF9        | 1.51  | 0.82  | 1.83 |
| 207936_x_at  | RFPL3       | 3.12  | 1.70  | 1.83 |
| 223707_at    | RPL27A      | 2.41  | 1.32  | 1.83 |
| 1570482_at   | ---         | 1.54  | 0.84  | 1.83 |
| 209534_x_at  | AKAP13      | 1.61  | 0.88  | 1.83 |

|              |          |      |      |      |
|--------------|----------|------|------|------|
| 204026_s_at  | ZWINT    | 2.20 | 1.20 | 1.83 |
| 224753_at    | CDCA5    | 2.03 | 1.11 | 1.82 |
| 202655_at    | MANF     | 2.23 | 1.22 | 1.82 |
| 208937_s_at  | ID1      | 1.55 | 0.85 | 1.82 |
| 218100_s_at  | IFT57    | 1.98 | 1.09 | 1.81 |
| 235067_at    | MKLN1    | 1.59 | 0.88 | 1.81 |
| 1559003_a_at | CCDC163F | 1.89 | 1.05 | 1.81 |
| 211713_x_at  | KIAA0101 | 1.79 | 0.99 | 1.81 |
| 213618_at    | ARAP2    | 2.07 | 1.14 | 1.81 |
| 202935_s_at  | SOX9     | 1.51 | 0.84 | 1.81 |
| 200918_s_at  | SRPR     | 1.77 | 0.98 | 1.80 |
| 203712_at    | KIAA0020 | 2.17 | 1.20 | 1.80 |
| 203145_at    | SPAG5    | 1.60 | 0.89 | 1.80 |
| 221781_s_at  | DNAJC10  | 3.40 | 1.89 | 1.80 |
| 201790_s_at  | DHCR7    | 1.82 | 1.01 | 1.79 |
| 229998_x_at  | FAM176B  | 1.89 | 1.05 | 1.79 |
| 1552937_s_at | ATRIP    | 1.55 | 0.87 | 1.79 |
| 215930_s_at  | CTAGE5   | 1.56 | 0.87 | 1.79 |
| 242069_at    | CBX5     | 2.32 | 1.30 | 1.78 |
| 211077_s_at  | TLK1     | 1.54 | 0.86 | 1.78 |
| 238448_at    | MRPL19   | 1.54 | 0.87 | 1.78 |
| 205282_at    | LRP8     | 2.15 | 1.21 | 1.78 |
| 221758_at    | ARMC6    | 1.66 | 0.93 | 1.78 |
| 217790_s_at  | SSR3     | 2.13 | 1.20 | 1.78 |
| 242775_at    | PTGR1    | 2.47 | 1.39 | 1.78 |
| 224615_x_at  | HM13     | 2.48 | 1.40 | 1.77 |
| 213912_at    | TBC1D30  | 2.15 | 1.21 | 1.77 |
| 213093_at    | PRKCA    | 2.40 | 1.35 | 1.77 |
| 242260_at    | MATR3    | 1.53 | 0.86 | 1.77 |
| 212295_s_at  | SLC7A1   | 1.55 | 0.88 | 1.77 |
| 235766_x_at  | RAB27A   | 5.65 | 3.21 | 1.76 |
| 238011_at    | ---      | 1.77 | 1.00 | 1.76 |
| 242592_at    | GPR137C  | 1.50 | 0.85 | 1.76 |
| 213951_s_at  | PSMC3IP  | 2.18 | 1.24 | 1.76 |
| 1565620_at   | AGAP4    | 1.94 | 1.10 | 1.76 |
| 218358_at    | CRELD2   | 1.69 | 0.96 | 1.76 |
| 1552572_a_at | MIPOL1   | 2.37 | 1.35 | 1.75 |
| 205505_at    | GCNT1    | 2.54 | 1.45 | 1.75 |
| 222412_s_at  | SSR3     | 2.49 | 1.42 | 1.75 |
| 232311_at    | B2M      | 1.77 | 1.01 | 1.75 |
| 220018_at    | CBLL1    | 3.60 | 2.06 | 1.75 |
| 237311_at    | ---      | 4.11 | 2.34 | 1.75 |
| 232319_at    | ---      | 1.56 | 0.89 | 1.75 |
| 1554712_a_at | GLYATL2  | 4.63 | 2.65 | 1.75 |
| 215892_at    | ZNF440   | 1.73 | 0.99 | 1.75 |
| 208433_s_at  | LRP8     | 1.77 | 1.01 | 1.75 |
| 1556321_a_at | ---      | 2.26 | 1.29 | 1.75 |
| 200890_s_at  | SSR1     | 2.37 | 1.36 | 1.74 |
| 235949_at    | TTC26    | 1.58 | 0.91 | 1.74 |
| 218070_s_at  | GMPPA    | 2.10 | 1.20 | 1.74 |
| 216237_s_at  | MCM5     | 2.58 | 1.48 | 1.74 |
| 229669_at    | LOC10050 | 1.62 | 0.93 | 1.74 |
| 206550_s_at  | NUP155   | 1.60 | 0.92 | 1.74 |
| 242258_at    | ---      | 2.02 | 1.16 | 1.74 |
| 201627_s_at  | INSIG1   | 3.37 | 1.94 | 1.74 |

|              |            |       |      |      |
|--------------|------------|-------|------|------|
| 200862_at    | DHCR24     | 5.01  | 2.88 | 1.74 |
| 235958_at    | PLA2G4F    | 1.64  | 0.95 | 1.74 |
| 201127_s_at  | ACLY       | 2.07  | 1.19 | 1.74 |
| 233511_at    | ---        | 1.54  | 0.89 | 1.74 |
| 222725_s_at  | PALMD      | 4.98  | 2.87 | 1.74 |
| 205316_at    | SLC15A2    | 16.06 | 9.26 | 1.73 |
| 205942_s_at  | ACSM3      | 3.41  | 1.97 | 1.73 |
| 224316_at    | ---        | 1.69  | 0.98 | 1.73 |
| 205510_s_at  | FLJ10038   | 2.14  | 1.24 | 1.73 |
| 204820_s_at  | BTN3A2 /// | 1.58  | 0.91 | 1.72 |
| 232281_at    | LOC14818   | 2.03  | 1.18 | 1.72 |
| 216640_s_at  | PDIA6      | 1.86  | 1.08 | 1.72 |
| 209100_at    | IFRD2      | 1.70  | 0.99 | 1.72 |
| 228369_at    | CNPY3      | 1.55  | 0.90 | 1.72 |
| 1554116_s_at | PARP11     | 1.73  | 1.01 | 1.72 |
| 201626_at    | INSIG1     | 2.53  | 1.47 | 1.72 |
| 238797_at    | TRIM11     | 1.82  | 1.06 | 1.71 |
| 1563075_s_at | ---        | 2.48  | 1.45 | 1.71 |
| 237817_at    | ---        | 3.44  | 2.01 | 1.71 |
| 201247_at    | SREBF2     | 1.69  | 0.99 | 1.71 |
| 1555758_a_at | CDKN3      | 1.99  | 1.16 | 1.71 |
| 222036_s_at  | MCM4       | 1.52  | 0.89 | 1.71 |
| 204017_at    | KDELR3     | 2.02  | 1.18 | 1.71 |
| 212811_x_at  | SLC1A4     | 1.73  | 1.02 | 1.70 |
| 209286_at    | CDC42EP3   | 2.50  | 1.47 | 1.70 |
| 219207_at    | EDC3       | 2.31  | 1.36 | 1.70 |
| 205896_at    | SLC22A4    | 3.00  | 1.77 | 1.70 |
| 209920_at    | BMPR2      | 1.95  | 1.15 | 1.70 |
| 244760_at    | HERC6      | 6.19  | 3.65 | 1.70 |
| 214240_at    | GAL        | 2.28  | 1.35 | 1.69 |
| 209291_at    | ID4        | 2.13  | 1.26 | 1.69 |
| 229975_at    | BMPR1B     | 3.01  | 1.78 | 1.69 |
| 201562_s_at  | SORD       | 7.18  | 4.25 | 1.69 |
| 218886_at    | PAK1IP1    | 5.86  | 3.47 | 1.69 |
| 242335_at    | SLC25A37   | 2.38  | 1.41 | 1.69 |
| 239282_at    | CCDC41     | 2.34  | 1.39 | 1.69 |
| 223164_at    | CCM2       | 1.53  | 0.91 | 1.69 |
| 209714_s_at  | CDKN3      | 1.71  | 1.01 | 1.69 |
| 234464_s_at  | EME1       | 2.12  | 1.26 | 1.69 |
| 1570339_x_at | ---        | 1.67  | 0.99 | 1.68 |
| 218059_at    | ZNF706     | 2.38  | 1.42 | 1.68 |
| 200652_at    | SSR2       | 2.08  | 1.24 | 1.68 |
| 224484_s_at  | BRMS1L     | 2.17  | 1.30 | 1.67 |
| 212590_at    | RRAS2      | 1.59  | 0.95 | 1.67 |
| 231959_at    | LIN52      | 1.66  | 0.99 | 1.67 |
| 219388_at    | GRHL2      | 2.37  | 1.42 | 1.67 |
| 208658_at    | PDIA4      | 2.11  | 1.26 | 1.67 |
| 243188_at    | ZNF283     | 1.60  | 0.96 | 1.67 |
| 227340_s_at  | RGMB       | 1.81  | 1.09 | 1.67 |
| 222231_s_at  | LRRC59     | 2.31  | 1.38 | 1.67 |
| 217014_s_at  | AZGP1      | 15.25 | 9.14 | 1.67 |
| 222519_s_at  | IFT57      | 2.04  | 1.23 | 1.67 |
| 219306_at    | KIF15      | 1.68  | 1.01 | 1.67 |
| 202068_s_at  | LDLR       | 3.27  | 1.96 | 1.67 |
| 201798_s_at  | MYOF       | 1.61  | 0.97 | 1.66 |



|              |          |        |        |      |
|--------------|----------|--------|--------|------|
| 222854_s_at  | GEMIN8   | 1.95   | 1.17   | 1.66 |
| 1554472_a_at | PHF20L1  | 1.59   | 0.96   | 1.66 |
| 214106_s_at  | GMDS     | 1.71   | 1.03   | 1.66 |
| 226234_at    | GDF11    | 1.89   | 1.14   | 1.66 |
| 1560070_at   | ---      | 3.28   | 1.97   | 1.66 |
| 212527_at    | PPPDE2   | 1.72   | 1.04   | 1.66 |
| 231873_at    | BMPR2    | 2.15   | 1.30   | 1.66 |
| 203379_at    | RPS6KA1  | 1.54   | 0.93   | 1.66 |
| 213629_x_at  | MT1F     | 2.05   | 1.24   | 1.65 |
| 242827_x_at  | ---      | 3.85   | 2.33   | 1.65 |
| 202286_s_at  | TACSTD2  | 2.61   | 1.58   | 1.65 |
| 203269_at    | NSMAF    | 3.02   | 1.83   | 1.65 |
| 233065_at    | RNF207   | 1.71   | 1.04   | 1.65 |
| 204768_s_at  | FEN1     | 1.90   | 1.15   | 1.65 |
| 212665_at    | TIPARP   | 1.72   | 1.04   | 1.65 |
| 221541_at    | CRISPLD2 | 1.95   | 1.19   | 1.64 |
| 214255_at    | ATP10A   | 3.00   | 1.83   | 1.64 |
| 227235_at    | GUCY1A3  | 1.95   | 1.19   | 1.64 |
| 201727_s_at  | ELAVL1   | 1.71   | 1.04   | 1.64 |
| 1553645_at   | CCDC141  | 275.89 | 168.00 | 1.64 |
| 212712_at    | CAMSAP1  | 2.03   | 1.23   | 1.64 |
| 203385_at    | DGKA     | 1.75   | 1.07   | 1.64 |
| 230518_at    | MPZL2    | 1.52   | 0.93   | 1.64 |
| 214484_s_at  | SIGMAR1  | 1.92   | 1.17   | 1.64 |
| 1554486_a_at | C6orf114 | 1.79   | 1.09   | 1.64 |
| 219118_at    | FKBP11   | 2.68   | 1.64   | 1.64 |
| 208962_s_at  | FADS1    | 1.97   | 1.21   | 1.64 |
| 201579_at    | FAT1     | 1.85   | 1.13   | 1.64 |
| 213577_at    | SQLE     | 2.20   | 1.35   | 1.64 |
| 210095_s_at  | IGFBP3   | 2.15   | 1.32   | 1.63 |
| 205909_at    | POLE2    | 2.81   | 1.72   | 1.63 |
| 201791_s_at  | DHCR7    | 1.94   | 1.19   | 1.63 |
| 228871_at    | ALG14    | 2.03   | 1.24   | 1.63 |
| 241721_at    | ---      | 1.93   | 1.18   | 1.63 |
| 204058_at    | ME1      | 1.65   | 1.01   | 1.63 |
| 1554691_a_at | PACSIN2  | 1.62   | 1.00   | 1.63 |
| 200831_s_at  | SCD      | 2.15   | 1.32   | 1.62 |
| 242348_at    | FAM19A4  | 2.21   | 1.36   | 1.62 |
| 243031_at    | ---      | 1.62   | 1.00   | 1.62 |
| 35666_at     | SEMA3F   | 1.82   | 1.12   | 1.62 |
| 205833_s_at  | PART1    | 2.80   | 1.73   | 1.62 |
| 235707_at    | LOC22171 | 1.60   | 0.99   | 1.62 |
| 236836_at    | ---      | 1.70   | 1.05   | 1.62 |
| 237439_at    | USP43    | 1.96   | 1.21   | 1.62 |
| 229632_s_at  | INTS10   | 3.18   | 1.97   | 1.62 |
| 228736_at    | HELQ     | 1.58   | 0.98   | 1.62 |
| 36830_at     | MIPEP    | 1.58   | 0.98   | 1.62 |
| 201516_at    | SRM      | 2.03   | 1.26   | 1.62 |
| 226226_at    | TMEM45B  | 2.04   | 1.27   | 1.61 |
| 206364_at    | KIF14    | 2.23   | 1.38   | 1.61 |
| 222497_x_at  | NMD3     | 1.53   | 0.95   | 1.61 |
| 219551_at    | EAF2     | 19.19  | 11.92  | 1.61 |
| 226525_at    | STK17B   | 5.83   | 3.63   | 1.61 |
| 202207_at    | ARL4C    | 2.13   | 1.32   | 1.61 |
| 243309_at    | FLJ27352 | 1.85   | 1.15   | 1.60 |

|              |          |       |      |      |
|--------------|----------|-------|------|------|
| 222304_x_at  | OR7E47P  | 1.55  | 0.97 | 1.60 |
| 228818_at    | ---      | 4.01  | 2.50 | 1.60 |
| 1555878_at   | RPS24    | 1.70  | 1.06 | 1.60 |
| 210667_s_at  | C21orf33 | 1.81  | 1.13 | 1.60 |
| 228968_at    | ZNF449   | 1.53  | 0.95 | 1.60 |
| 243027_at    | IGSF5    | 3.11  | 1.95 | 1.60 |
| 202558_s_at  | HSPA13   | 1.93  | 1.21 | 1.60 |
| 208842_s_at  | GORASP2  | 1.53  | 0.96 | 1.60 |
| 232397_at    | LOC10050 | 11.92 | 7.48 | 1.59 |
| 1558292_s_at | PIGW     | 1.62  | 1.01 | 1.59 |
| 229530_at    | GUCY1A3  | 1.55  | 0.97 | 1.59 |
| 220187_at    | STEAP4   | 13.81 | 8.67 | 1.59 |
| 212839_s_at  | TROVE2   | 1.54  | 0.96 | 1.59 |
| 225687_at    | FAM83D   | 1.96  | 1.23 | 1.59 |
| 1554406_a_at | CLEC7A   | 1.81  | 1.14 | 1.59 |
| 223108_s_at  | ZCCHC17  | 1.98  | 1.25 | 1.59 |
| 236915_at    | C4orf47  | 1.56  | 0.99 | 1.59 |
| 204059_s_at  | ME1      | 1.66  | 1.05 | 1.59 |
| 223544_at    | TMEM79   | 6.54  | 4.13 | 1.58 |
| 210534_s_at  | B9D1     | 1.55  | 0.98 | 1.58 |
| 227105_at    | CSPP1    | 1.56  | 0.99 | 1.58 |
| 217787_s_at  | GALNT2   | 1.60  | 1.01 | 1.58 |
| 218349_s_at  | ZWILCH   | 2.11  | 1.33 | 1.58 |
| 221942_s_at  | GUCY1A3  | 2.19  | 1.39 | 1.58 |
| 200889_s_at  | SSR1     | 2.99  | 1.90 | 1.58 |
| 223001_at    | OSTC     | 2.05  | 1.30 | 1.58 |
| 218708_at    | NXT1     | 1.63  | 1.04 | 1.57 |
| 212767_at    | MTG1     | 1.67  | 1.06 | 1.57 |
| 203267_s_at  | DRG2     | 1.75  | 1.11 | 1.57 |
| 221629_x_at  | C8orf30A | 1.63  | 1.04 | 1.57 |
| 201894_s_at  | SSR1     | 2.00  | 1.28 | 1.57 |
| 1555543_a_at | CLCC1    | 1.72  | 1.09 | 1.57 |
| 214021_x_at  | ITGB5    | 1.90  | 1.21 | 1.57 |
| 219736_at    | TRIM36   | 3.05  | 1.95 | 1.57 |
| 228050_at    | UTP15    | 1.90  | 1.22 | 1.57 |
| 209515_s_at  | RAB27A   | 5.81  | 3.71 | 1.57 |
| 205429_s_at  | MPP6     | 2.34  | 1.49 | 1.57 |
| 232149_s_at  | NSMAF    | 3.14  | 2.01 | 1.57 |
| 225094_at    | SETD8    | 2.20  | 1.40 | 1.56 |
| 235846_at    | ---      | 4.66  | 2.98 | 1.56 |
| 225367_at    | PGM2     | 2.08  | 1.33 | 1.56 |
| 1560446_at   | LOC10013 | 2.04  | 1.31 | 1.56 |
| 200947_s_at  | GLUD1    | 2.78  | 1.78 | 1.56 |
| 200771_at    | LAMC1    | 4.39  | 2.81 | 1.56 |
| 235113_at    | PPIL5    | 1.63  | 1.05 | 1.56 |
| 220625_s_at  | ELF5     | 1.66  | 1.07 | 1.56 |
| 235543_at    | ---      | 1.53  | 0.98 | 1.56 |
| 242098_at    | KIAA1244 | 1.64  | 1.05 | 1.56 |
| 229443_at    | C6orf125 | 1.51  | 0.97 | 1.56 |
| 202557_at    | HSPA13   | 2.23  | 1.43 | 1.56 |
| 239106_at    | CA5BP    | 1.81  | 1.16 | 1.56 |
| 205221_at    | HGD      | 2.40  | 1.54 | 1.56 |
| 209759_s_at  | DCI      | 2.01  | 1.29 | 1.56 |
| 240016_at    | ---      | 1.75  | 1.13 | 1.55 |
| 202613_at    | CTPS     | 1.64  | 1.06 | 1.55 |

|              |           |       |       |      |
|--------------|-----------|-------|-------|------|
| 1563051_at   | OSBP      | 2.14  | 1.38  | 1.55 |
| 212064_x_at  | MAZ       | 2.84  | 1.83  | 1.55 |
| 1559654_s_at | LOC10028  | 1.81  | 1.17  | 1.55 |
| 215794_x_at  | GLUD2     | 2.84  | 1.84  | 1.55 |
| 200700_s_at  | KDELR2    | 2.56  | 1.66  | 1.54 |
| 207668_x_at  | PDIA6     | 1.64  | 1.06  | 1.54 |
| 203857_s_at  | PDIA5     | 4.95  | 3.21  | 1.54 |
| 242073_at    | ---       | 2.15  | 1.39  | 1.54 |
| 205319_at    | PSCA      | 2.75  | 1.79  | 1.54 |
| 242579_at    | BMP1B     | 3.48  | 2.26  | 1.54 |
| 1555832_s_at | KLF6      | 1.81  | 1.17  | 1.54 |
| 219252_s_at  | GEMIN8    | 1.77  | 1.15  | 1.54 |
| 232252_at    | DUSP27    | 4.92  | 3.20  | 1.54 |
| 235965_at    | ---       | 4.29  | 2.79  | 1.54 |
| 37005_at     | NBL1      | 8.87  | 5.78  | 1.54 |
| 201770_at    | SNRPA     | 1.54  | 1.00  | 1.54 |
| 217981_s_at  | FXC1      | 2.04  | 1.33  | 1.54 |
| 214947_at    | FAM105A   | 3.14  | 2.05  | 1.53 |
| 243762_at    | ---       | 11.66 | 7.61  | 1.53 |
| 1552314_a_at | EYA3      | 3.10  | 2.03  | 1.53 |
| 228559_at    | CENPN     | 24.91 | 16.27 | 1.53 |
| 1560402_at   | GAS5      | 1.68  | 1.10  | 1.53 |
| 224465_s_at  | WIBG      | 2.44  | 1.60  | 1.53 |
| 203270_at    | DTYMK     | 1.68  | 1.10  | 1.53 |
| 220549_at    | RAD54B    | 4.27  | 2.80  | 1.53 |
| 220200_s_at  | SETD8     | 2.56  | 1.67  | 1.53 |
| 218826_at    | SLC35F2   | 4.92  | 3.22  | 1.53 |
| 236088_at    | NTNG1     | 1.54  | 1.01  | 1.53 |
| 219260_s_at  | C17orf81  | 1.76  | 1.15  | 1.53 |
| 218096_at    | AGPAT5    | 1.90  | 1.25  | 1.53 |
| 206363_at    | MAF       | 16.30 | 10.67 | 1.53 |
| 202276_at    | SHFM1     | 1.64  | 1.08  | 1.53 |
| 204010_s_at  | KRAS      | 1.70  | 1.11  | 1.53 |
| 201123_s_at  | EIF5A     | 1.61  | 1.06  | 1.53 |
| 203450_at    | CBY1      | 1.68  | 1.10  | 1.53 |
| 227787_s_at  | MED30     | 1.75  | 1.15  | 1.52 |
| 226486_at    | MTERFD2   | 2.04  | 1.34  | 1.52 |
| 219098_at    | MYBBP1A   | 1.54  | 1.01  | 1.52 |
| 219826_at    | ZNF419    | 1.65  | 1.08  | 1.52 |
| 205687_at    | UBFD1     | 1.74  | 1.14  | 1.52 |
| 223738_s_at  | PGM2      | 1.98  | 1.30  | 1.52 |
| 223852_s_at  | STK40     | 1.58  | 1.04  | 1.52 |
| 230492_s_at  | GPCPD1    | 1.75  | 1.15  | 1.52 |
| 227695_at    | GLYATL1   | 2.18  | 1.44  | 1.52 |
| 214649_s_at  | MTMR2     | 2.51  | 1.65  | 1.52 |
| 210811_s_at  | DDX49     | 1.57  | 1.04  | 1.52 |
| 203211_s_at  | MTMR2     | 2.17  | 1.43  | 1.52 |
| 1569253_at   | INTS4     | 1.62  | 1.07  | 1.52 |
| 203788_s_at  | SEMA3C    | 2.25  | 1.49  | 1.52 |
| 217200_x_at  | CYB561    | 1.77  | 1.17  | 1.52 |
| 201490_s_at  | PPIF      | 1.88  | 1.24  | 1.51 |
| 205324_s_at  | FTSJ1     | 1.58  | 1.05  | 1.51 |
| 227812_at    | TNFRSF10C | 1.62  | 1.07  | 1.51 |
| 208837_at    | TMED3     | 1.95  | 1.29  | 1.51 |
| 218193_s_at  | GOLT1B    | 2.43  | 1.61  | 1.51 |

|             |         |      |      |      |
|-------------|---------|------|------|------|
| 210493_s_at | MFAP3L  | 2.02 | 1.34 | 1.51 |
| 216962_at   | RPAIN   | 1.65 | 1.09 | 1.51 |
| 214153_at   | ELOVL5  | 2.20 | 1.46 | 1.51 |
| 1553575_at  | ND6     | 1.68 | 1.11 | 1.51 |
| 238121_at   | GK5     | 1.51 | 1.00 | 1.51 |
| 227794_at   | GLYATL1 | 3.26 | 2.17 | 1.51 |
| 224990_at   | C4orf34 | 1.81 | 1.20 | 1.51 |
| 243121_x_at | ---     | 1.51 | 1.00 | 1.50 |
| 202669_s_at | EFNB2   | 1.88 | 1.25 | 1.50 |
| 37384_at    | PPM1F   | 1.65 | 1.09 | 1.50 |
| 202418_at   | YIF1A   | 1.91 | 1.27 | 1.50 |
| 219968_at   | ZNF589  | 2.42 | 1.61 | 1.50 |
| 205835_s_at | YTHDC2  | 1.90 | 1.26 | 1.50 |
| 215471_s_at | MAP7    | 1.92 | 1.28 | 1.50 |
| 242731_x_at | ---     | 2.00 | 1.33 | 1.50 |
| 203679_at   | TMED1   | 1.51 | 1.00 | 1.50 |
