# Supplementary material
Source: PubMed Central journal article supplement (PMC3630885)
Supplement: supp_M112.438473_jbc.M112.438473-3.pdf [file supp_M112.438473_jbc.M112.438473-3.pdf]

**Supplemental Table 2: Genes repressed by Elk1 alone**

| <b>AFFY IDS</b> | <b>Gene</b> | <b>Control shRNA / Elk1 shRNA</b> |
|-----------------|-------------|-----------------------------------|
| 207165_at       | HMMR        | 0.07                              |
| 218663_at       | NCAPG       | 0.10                              |
| 1554095_at      | RBM33       | 0.13                              |
| 201890_at       | RRM2        | 0.13                              |
| 218662_s_at     | NCAPG       | 0.15                              |
| 209773_s_at     | RRM2        | 0.15                              |
| 202503_s_at     | KIAA0101    | 0.15                              |
| 228273_at       | PRR11       | 0.16                              |
| 222608_s_at     | ANLN        | 0.17                              |
| 219148_at       | PBK         | 0.18                              |
| 219493_at       | SHCBP1      | 0.19                              |
| 218039_at       | NUSAP1      | 0.20                              |
| 210559_s_at     | CDK1        | 0.21                              |
| 36830_at        | MIPEP       | 0.22                              |
| 203554_x_at     | PTTG1       | 0.22                              |
| 223381_at       | NUF2        | 0.23                              |
| 204326_x_at     | MT1X        | 0.24                              |
| 211456_x_at     | MT1P2       | 0.24                              |
| 204607_at       | HMGCS2      | 0.24                              |
| 219978_s_at     | NUSAP1      | 0.25                              |
| 202705_at       | CCNB2       | 0.25                              |
| 205376_at       | INPP4B      | 0.25                              |
| 204286_s_at     | PMAIP1      | 0.25                              |
| 208581_x_at     | MT1X        | 0.26                              |
| 223700_at       | MND1        | 0.26                              |
| 206461_x_at     | MT1H        | 0.26                              |
| 204531_s_at     | BRCA1       | 0.27                              |
| 229551_x_at     | ZNF367      | 0.27                              |
| 228069_at       | FAM54A      | 0.28                              |
| 204026_s_at     | ZWINT       | 0.28                              |
| 204444_at       | KIF11       | 0.28                              |
| 204423_at       | MKLN1       | 0.28                              |
| 205421_at       | SLC22A3     | 0.28                              |
| 203755_at       | BUB1B       | 0.28                              |
| 222680_s_at     | DTL         | 0.28                              |
| 225655_at       | UHRF1       | 0.29                              |
| 202954_at       | UBE2C       | 0.29                              |
| 223307_at       | CDCA3       | 0.29                              |
| 217165_x_at     | MT1F        | 0.29                              |
| 220738_s_at     | RPS6KA6     | 0.31                              |
| 203214_x_at     | CDK1        | 0.31                              |
| 242592_at       | GPR137C     | 0.32                              |
| 244881_at       | LMLN        | 0.32                              |
| 237939_at       | EPHA5       | 0.32                              |
| 213599_at       | OIP5        | 0.33                              |
| 243001_at       | RBFA        | 0.33                              |
| 225687_at       | FAM83D      | 0.33                              |
| 216336_x_at     | LOC1005055  | 0.33                              |
| 204745_x_at     | MT1G        | 0.33                              |
| 242578_x_at     | SLC22A3     | 0.34                              |
| 205876_at       | LIFR        | 0.34                              |
| 204241_at       | ACOX3       | 0.34                              |

|              |            |      |
|--------------|------------|------|
| 1570482_at   | ---        | 0.35 |
| 225520_at    | MTHFD1L    | 0.35 |
| 1555758_a_at | CDKN3      | 0.35 |
| 218479_s_at  | XPO4       | 0.35 |
| 1557129_a_at | FAM111B    | 0.35 |
| 204285_s_at  | PMAIP1     | 0.35 |
| 209714_s_at  | CDKN3      | 0.37 |
| 244760_at    | HERC6      | 0.38 |
| 218883_s_at  | MLF1IP     | 0.38 |
| 228050_at    | UTP15      | 0.39 |
| 217127_at    | CTH        | 0.39 |
| 230150_at    | BCAP29     | 0.40 |
| 214710_s_at  | CCNB1      | 0.40 |
| 228490_at    | ABHD2      | 0.40 |
| 203362_s_at  | MAD2L1     | 0.40 |
| 223772_s_at  | TMEM87A    | 0.41 |
| 213913_s_at  | TBC1D30    | 0.41 |
| 212712_at    | CAMSAP1    | 0.42 |
| 222309_at    | LOC1005069 | 0.42 |
| 218647_s_at  | YRDC       | 0.42 |
| 222077_s_at  | RACGAP1    | 0.42 |
| 1553697_at   | C1orf96    | 0.42 |
| 227771_at    | LIFR       | 0.42 |
| 205047_s_at  | ASNS       | 0.42 |
| 204244_s_at  | DBF4       | 0.42 |
| 214140_at    | SLC25A16   | 0.43 |
| 235386_at    | ---        | 0.43 |
| 211150_s_at  | DLAT       | 0.43 |
| 220295_x_at  | DEPDC1     | 0.43 |
| 208079_s_at  | AURKA      | 0.43 |
| 1558014_s_at | FAR1       | 0.43 |
| 210793_s_at  | NUP98      | 0.43 |
| 201599_at    | OAT        | 0.43 |
| 214482_at    | ZBTB25     | 0.43 |
| 235062_at    | PIH1D2     | 0.44 |
| 204146_at    | RAD51AP1   | 0.44 |
| 212543_at    | AIM1       | 0.44 |
| 213912_at    | TBC1D30    | 0.44 |
| 228729_at    | CCNB1      | 0.44 |
| 219105_x_at  | ORC6       | 0.45 |
| 1555274_a_at | EPT1       | 0.45 |
| 1554217_a_at | CCDC132    | 0.45 |
| 226809_at    | LOC1002164 | 0.45 |
| 202288_at    | MTOR       | 0.45 |
| 219736_at    | TRIM36     | 0.46 |
| 216228_s_at  | WDHD1      | 0.46 |
| 233110_s_at  | BCL2L12    | 0.46 |
| 1553810_a_at | KIAA1524   | 0.46 |
| 205505_at    | GCNT1      | 0.46 |
| 87100_at     | ABHD2      | 0.46 |
| 205566_at    | ABHD2      | 0.46 |
| 208964_s_at  | FADS1      | 0.47 |
| 224753_at    | CDCA5      | 0.47 |
| 1555250_a_at | CPEB3      | 0.47 |
| 224484_s_at  | BRMS1L     | 0.48 |

|             |         |      |
|-------------|---------|------|
| 226936_at   | CENPW   | 0.48 |
| 212973_at   | RPIA    | 0.48 |
| 239669_at   | ---     | 0.48 |
| 221963_x_at | ---     | 0.48 |
| 201626_at   | INSIG1  | 0.48 |
| 219494_at   | RAD54B  | 0.48 |
| 202402_s_at | CARS    | 0.48 |
| 201516_at   | SRM     | 0.49 |
| 209825_s_at | UCK2    | 0.49 |
| 213836_s_at | WIPI1   | 0.49 |
| 213433_at   | ARL3    | 0.49 |
| 239580_at   | GUCY1A3 | 0.49 |
| 208693_s_at | GARS    | 0.49 |
| 227560_at   | SFXN2   | 0.49 |
| 227368_at   | ---     | 0.49 |
| 235550_at   | MAP9    | 0.49 |
| 203145_at   | SPAG5   | 0.49 |
| 213189_at   | MINA    | 0.49 |
| 202906_s_at | NBN     | 0.49 |
| 203276_at   | LMNB1   | 0.50 |
| 235425_at   | SGOL2   | 0.50 |
| 238513_at   | PRRG4   | 0.50 |
| 205489_at   | CRYM    | 0.50 |
