# Supplementary material
Source: PubMed Central journal article supplement (PMC3630885)
Supplement: supp_M112.438473_jbc.M112.438473-4.pdf [file supp_M112.438473_jbc.M112.438473-4.pdf]

**Supplemental Table 3: Genes activated by Elk1 alone**

| <b>AFFY IDS</b> | <b>Gene</b> | <b>Control shRNA / Elk1 shRNA</b> |
|-----------------|-------------|-----------------------------------|
| 210095_s_at     | IGFBP3      | 6.71                              |
| 223092_at       | ANKH        | 6.27                              |
| 203908_at       | SLC4A4      | 4.60                              |
| 201739_at       | SGK1        | 4.04                              |
| 223093_at       | ANKH        | 4.03                              |
| 205925_s_at     | RAB3B       | 3.98                              |
| 200920_s_at     | BTG1        | 3.90                              |
| 209706_at       | NKX3-1      | 3.57                              |
| 210510_s_at     | NRP1        | 3.36                              |
| 229019_at       | ZNF385B     | 3.31                              |
| 218137_s_at     | SMAP1       | 3.28                              |
| 1569785_at      | ---         | 3.14                              |
| 209185_s_at     | IRS2        | 3.12                              |
| 203180_at       | ALDH1A3     | 3.03                              |
| 200921_s_at     | BTG1        | 2.82                              |
| 1555800_at      | ZNF385B     | 2.82                              |
| 1567219_at      | ---         | 2.73                              |
| 230659_at       | EDEM1       | 2.72                              |
| 223201_s_at     | TMEM164     | 2.72                              |
| 213675_at       | ---         | 2.69                              |
| 236088_at       | NTNG1       | 2.66                              |
| 242629_at       | RAB3B       | 2.61                              |
| 235180_at       | STYX        | 2.60                              |
| 244650_at       | FAM105A     | 2.55                              |
| 229327_s_at     | ---         | 2.54                              |
| 1563571_at      | LOC285463   | 2.51                              |
| 219049_at       | CSGALNAC1   | 2.46                              |
| 222455_s_at     | PARVA       | 2.46                              |
| 217890_s_at     | PARVA       | 2.43                              |
| 242752_at       | ---         | 2.42                              |
| 209142_s_at     | UBE2G1      | 2.37                              |
| 221865_at       | C9orf91     | 2.37                              |
| 222121_at       | ARHGEF26    | 2.34                              |
| 209130_at       | SNAP23      | 2.32                              |
| 227198_at       | AFF3        | 2.30                              |
| 222450_at       | PMEPA1      | 2.28                              |
| 224661_at       | PIGY        | 2.25                              |
| 227337_at       | ANKRD37     | 2.25                              |
| 235749_at       | UGGT2       | 2.23                              |
| 220302_at       | MAK         | 2.23                              |
| 227787_s_at     | MED30       | 2.21                              |
| 202948_at       | IL1R1       | 2.19                              |
| 231262_at       | ---         | 2.18                              |
| 224999_at       | EGFR        | 2.16                              |
| 227123_at       | RAB3B       | 2.15                              |
| 217014_s_at     | AZGP1       | 2.11                              |
| 1558692_at      | C1orf85     | 2.09                              |
| 1566079_at      | RPS16P5     | 2.07                              |
| 217875_s_at     | PMEPA1      | 2.07                              |
| 216860_s_at     | GDF11       | 2.04                              |
| 225330_at       | IGF1R       | 2.04                              |
| 219572_at       | CADPS2      | 2.04                              |

|             |        |      |
|-------------|--------|------|
| 218376_s_at | MICAL1 | 2.02 |
| 244397_at   | ---    | 2.02 |
| 205883_at   | ZBTB16 | 2.01 |
